# Supplementary material for: Evaluation of MAOA Gene Polymorphism on the Efficacy of Antidepressant Treatment and Craving Severity for Betel-Quid Use Disorder
Source: Preprints.org preprint supplement (doi:10.20944/preprints202408.0036.v1), 2024-08-02
Supplement: Supplementary file 1 [file supplementary]

**Supplementary figures:**

**Interaction between MAOA genotypes and follow-up Yales-Brown Compulsive Obsessive Scale-betel-quid**


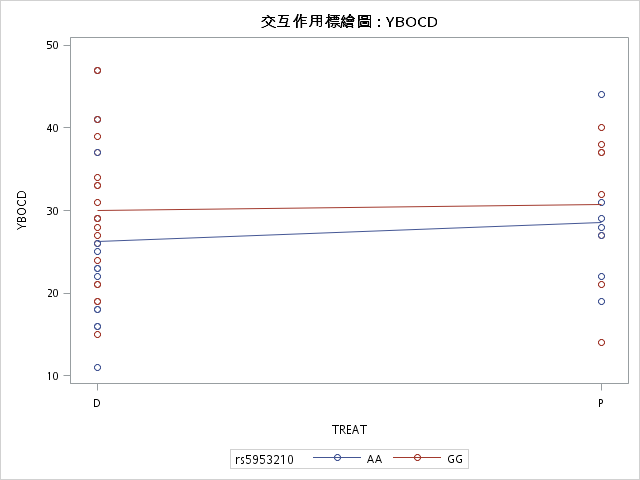


Figure S1. Interaction between MAOA genotypes and follow-up Yales-Brown Compulsive Obsessive Scale-betel-quid (Week 0)


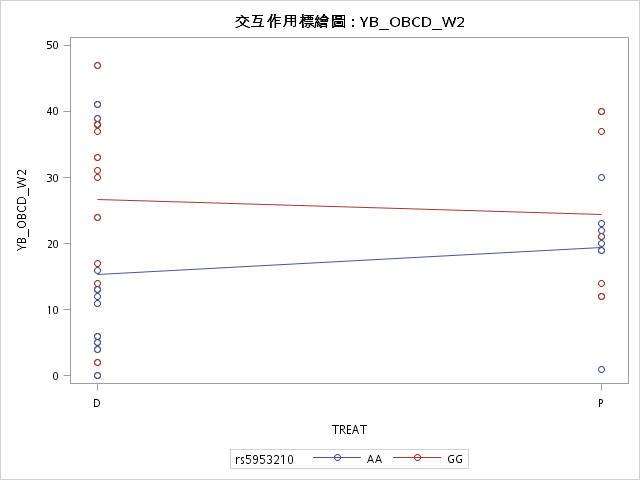


Figure S2. Interaction between MAOA genotypes and follow-up Yales-Brown Compulsive Obsessive Scale-betel-quid (follow-up time: Week 2)


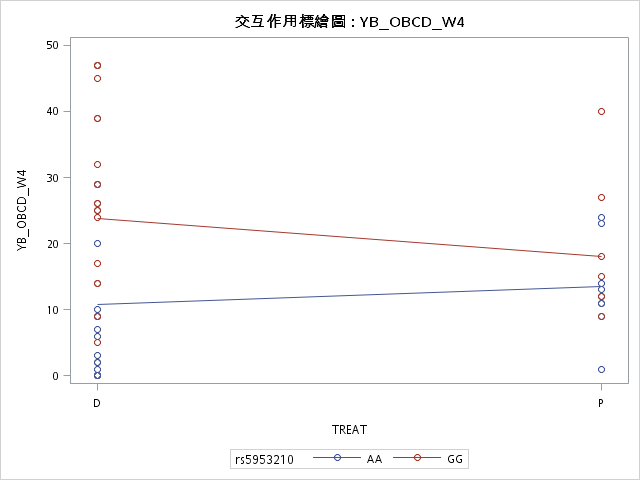


Figure S3. Interaction between MAOA genotypes and follow-up Yales-Brown Compulsive Obsessive Scale-betel-quid (follow-up time: Week 4)


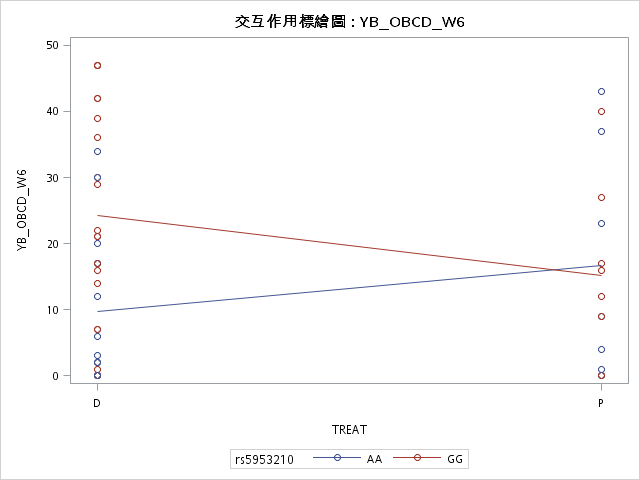


Figure S4. Interaction between MAOA genotypes and follow-up Yales-Brown Compulsive Obsessive Scale-betel-quid (follow-up time: Week 6)


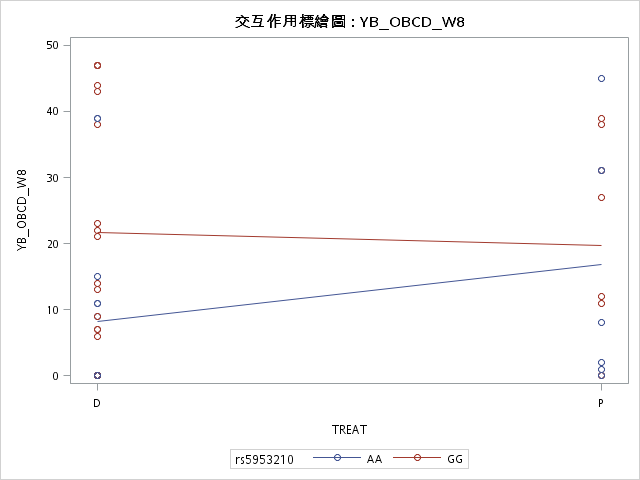


Figure S5. Interaction between MAOA genotypes and follow-up Yales-Brown Compulsive Obsessive Scale-betel-quid (follow-up time: Week 8)
